# Supplementary material for: Bromopyridazinedione-mediated protein and peptide bioconjugation
Source: PubMed Central journal article supplement — Chem Commun (Camb). 2011 Jul 7;47(31):8781–3. doi: 10.1039/c1cc12807h (PMC3379626; doi:10.1039/c1cc12807h), 2011-07-07
Supplement: CC-047-c1cc12807h-s001.pdf [file CC-047-c1cc12807h-s001.pdf]

## SUPPORTING INFORMATION

### Bromopyridazinedione-mediated protein and peptide bioconjugation

Vijay Chudisama,<sup>a</sup> Mark E. B. Smith,<sup>a</sup> Felix F. Schumacher,<sup>a</sup> Danai Papaioannou,<sup>b</sup>  
Gabriel Waksman,<sup>b</sup> James R. Baker<sup>a</sup> and Stephen Caddick<sup>\*a</sup>

*a.* Department of Chemistry, UCL, 20 Gordon Street, London, WC1H 0AJ, U.K.; *b.* Institute of Structural Molecular Biology at UCL/Birkbeck, Malet Street, London, WC1E 7HX, U.K.

#### 1. General Procedures

<sup>1</sup>H and <sup>13</sup>C NMR spectra were recorded at room temperature on a Bruker Avance 600 instrument operating at a frequency of 600 MHz for <sup>1</sup>H and 150 MHz for <sup>13</sup>C. <sup>1</sup>H NMR spectra were referenced to the CDCl<sub>3</sub> (7.26 ppm) signal. <sup>13</sup>C NMR spectra were referenced to the CDCl<sub>3</sub> (77.67 ppm) signal. Infra-red spectra were run on a PerkinElmer Spectrum 100 FT-IR spectrometer operating in ATR mode with frequencies given in reciprocal centimeters (cm<sup>-1</sup>). Mass spectra and high resolution mass data for small molecules were recorded on a VG70-SE mass spectrometer (EI and CI mode). Maleic hydrazide and lyophilised somatostatin were purchased from Sigma-Aldrich and used without further purification.

#### 2. Protein / Peptide Mass Spectrometry

LC-MS was performed on protein samples using a Waters Acquity uPLC connected to Waters Acquity Single Quad Detector (SQD). Column: Acquity uPLC BEH C18 1.7 μm 2.1 x 50 mm. Wavelength: 254 nm. Mobile Phase: 95:5 Water (0.1% Formic Acid): MeCN (0.1% Formic Acid) Gradient over 4 min (to 5:95 Water (0.1% Formic Acid): MeCN (0.1% Formic Acid)). Flow Rate: 0.6 mL/min. MS Mode: ES+. Scan Range: m/z = 85-2000. Scan time: 0.25 s. Data obtained in continuum mode. The electrospray source of the MS was operated with a capillary voltage of 3.5 kV and a cone voltage of 50 V. Nitrogen was used as the nebulizer and desolvation gas at a total flow of 600 L/h. Total mass spectra for protein samples were reconstructed from the ion series using the MaxEnt 1 algorithm pre-installed on MassLynx software.

#### 3. Synthesis of Bromopyridazinediones and Intermediates.

##### 3.1 1,2-Diethyl-1,2-dihydro-pyridazine-3,6-dione 5

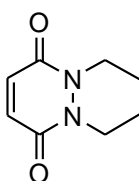

To a solution of maleic anhydride (98 mg, 1.0 mmol) in glacial AcOH (3 mL) was added *N,N'*-diethylhydrazine.2HCl (161 mg, 1.0 mmol) and the reaction mixture heated at 130 °C for 16 h. The solvent was removed *in vacuo* and the crude residue purified by column chromatography (50% EtOAc/Petrol to neat EtOAc) to give 1,2-

diethyl-1,2-dihydro-pyridazine-3,6-dione as a white solid (121 mg, 0.72 mmol, 72%):  $^1\text{H}$  NMR (600 MHz,  $\text{CDCl}_3$ )  $\delta$  6.85 (s, 2H), 4.11 (q,  $J = 7.0$  Hz, 4H), 1.25 (t,  $J = 7.0$  Hz, 6H);  $^{13}\text{C}$  NMR (150 MHz,  $\text{CDCl}_3$ )  $\delta$  157.6 (s), 134.7 (d), 40.2 (t), 13.3 (q); IR (solid) 2984, 1636, 1590  $\text{cm}^{-1}$ ; LRMS (CI) 169 (100,  $[\text{M}+\text{H}]^+$ ); HRMS (CI) calcd for  $\text{C}_8\text{H}_{13}\text{N}_2\text{O}_2$   $[\text{M}+\text{H}]^+$  169.0977, observed 169.0980.

### 3.2 4-Bromo-1,2-diethyl-1,2-dihydro-pyridazine-3,6-dione 7

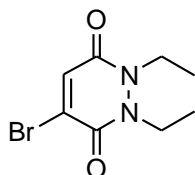

To a solution of 1,2-diethyl-1,2-dihydro-pyridazine-3,6-dione (168 mg, 1.0 mmol) in  $\text{CH}_2\text{Cl}_2$  (3 mL) was added bromine (1.59 g, 0.51 mL, 10.0 mmol) and the reaction mixture stirred at 20 °C for 16 h. The solvent and excess bromine were removed *in vacuo* and then was added  $\text{NEt}_3$  (405 mg, 558  $\mu\text{L}$ , 4.0 mmol) and  $\text{CH}_2\text{Cl}_2$  (3 mL) and the reaction mixture stirred at 20 °C for 16 h. The solvent was removed *in vacuo* and the crude residue purified by column chromatography (50% EtOAc/Petrol to neat EtOAc) to give 4-bromo-1,2-diethyl-1,2-dihydro-pyridazine-3,6-dione as a yellow solid (227 mg, 0.92 mmol, 92%):  $^1\text{H}$  NMR (600 MHz,  $\text{CDCl}_3$ )  $\delta$  7.31 (s, 1H), 4.14 (q,  $J = 7.0$  Hz, 2H), 4.07 (q,  $J = 7.0$  Hz, 2H), 1.26 (t,  $J = 7.0$  Hz, 3H), 1.22 (t,  $J = 7.0$  Hz, 3H);  $^{13}\text{C}$  NMR (150 MHz,  $\text{CDCl}_3$ )  $\delta$  156.2 (s), 154.3 (s), 136.0 (d), 133.7 (s), 41.9 (t), 40.7 (t), 13.3 (q), 13.3 (q); IR (solid) 3058, 2979, 2938, 1631, 1595  $\text{cm}^{-1}$ ; LRMS (CI) 249 (100,  $[\text{M}^{81}\text{Br}+\text{H}]^+$ ), 247 (100,  $[\text{M}^{79}\text{Br}+\text{H}]^+$ ); HRMS (CI) calcd for  $\text{C}_8\text{H}_{12}\text{BrN}_2\text{O}_2$   $[\text{M}^{81}\text{Br}+\text{H}]^+$  249.0082, observed 249.0086.

### 3.3 4,5-Dibromo-1,2-diethyl-1,2-dihydro-pyridazine-3,6-dione 8

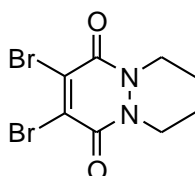

To a solution of 4-bromo-1,2-diethyl-1,2-dihydro-pyridazine-3,6-dione (248 mg, 1.0 mmol) in  $\text{CH}_2\text{Cl}_2$  (3 mL) was added bromine (1.59 g, 0.51 mL, 10.0 mmol) and the reaction mixture stirred at 50 °C for 72 h. The solvent and excess bromine were removed *in vacuo* and then was added  $\text{NEt}_3$  (405 mg, 558  $\mu\text{L}$ , 4.0 mmol) and  $\text{CH}_2\text{Cl}_2$  (3 mL) and the reaction mixture stirred at 20 °C for 16 h. The solvent was removed *in vacuo* and the crude residue purified by column chromatography (50% EtOAc/Petrol to neat EtOAc) to give 4,5-dibromo-1,2-diethyl-1,2-dihydro-pyridazine-3,6-dione as a yellow solid (295 mg, 0.91 mmol, 91%):  $^1\text{H}$  NMR (600 MHz,  $\text{CDCl}_3$ )  $\delta$  4.17 (q,  $J = 7.0$  Hz, 4H), 1.28 (t,  $J = 7.0$  Hz, 6H);  $^{13}\text{C}$  NMR (150 MHz,  $\text{CDCl}_3$ )  $\delta$  153.3 (s), 136.1 (s), 42.4 (t), 13.2 (q); IR (solid) 2979, 2937, 1630, 1574  $\text{cm}^{-1}$ ; LRMS (EI) 328 (50,  $[\text{M}^{81}\text{Br}^{81}\text{Br}]^+$ ), 326 (100,  $[\text{M}^{81}\text{Br}^{79}\text{Br}]^+$ ), 324 (50,  $[\text{M}^{79}\text{Br}^{79}\text{Br}]^+$ ); HRMS (EI) calcd for  $\text{C}_8\text{H}_{10}\text{Br}_2\text{N}_2\text{O}_2$   $[\text{M}^{79}\text{Br}^{79}\text{Br}]^+$  323.9104, observed 323.9097.

## 4. Protein and Peptide Modification

Sequence of isolated Grb2-SH2 L111C (residues 53-163) **3**: MGIEMKPHPWF  
FGKIPRAKAEEMLSKQRHDGAFLIRESESAPGDFSLSVK  
FGNDVQHFKVCRDGAGKYFLWVVKFNSLNELVDYHRS  
TSVSRNQQIFLRDIEQVPQQPTYVQAGSRSHHHHHH Stop.  
Calculated mass = 14168.

#### 4.1 Cloning and Expression of Grb2-SH2 L111C Mutant **3**<sup>1</sup>

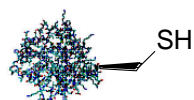

The DNA construct for the Grb2 SH2 domain contained the primary amino acid sequence 53-163 and was cloned on plasmid QE-60 (Qiagen).<sup>2</sup> The Grb2 SH2 L111C mutant was constructed by site-directed mutagenesis (Stratagene Kit) using oligonucleotides coding for the mutated residue. Both constructs were expressed in *Escherichia coli* (M15[pREP4], Qiagen) using a T5 promoter and a C-terminal 6-His Tag was incorporated to aid purification. Cultures (1 L) were grown at 37 °C in Terrific Broth. from a single colony, and expression was induced with 1.0 mM isopropyl  $\beta$ -D-1-thiogalactopyranoside when an O.D.<sub>600</sub> of 0.9 was attained. Cultures were allowed to express protein for 3 h before the cells were pelleted. Pellets were lysed in 0.1 M sodium phosphate, 300 mM NaCl, 50 mM imidazole, pH 7.2 containing a protease inhibitor cocktail (Roche). The lysate was centrifuged, and the supernatant was applied to a Ni-NTA column (Qiagen). Grb2-SH2 L111C was eluted from the Ni-NTA column with 0.1 M sodium phosphate, 300 mM NaCl, 200 mM imidazole at pH 7.2. The collected Grb2 SH2 L111C **3** was ~95% pure as visualized by Coomassie-stained SDS-PAGE. Dimerization of Grb2 SH2 domain through domain-swapping has been previously observed.<sup>3</sup> Dimeric and monomeric Grb2-SH2 were separated on a Sephacryl S-100 column (320 mL) that had been pre-equilibrated with 0.1 M sodium phosphate and 150 mM NaCl at pH 8.0. Two peaks eluted, corresponding to the molecular weights of monomer (~14 kDa) and dimer (~28 kDa) Grb2-SH2. Almost, 60% of the Grb2-SH2 L111C domain **3** eluted from the column as monomer. Separated monomer and dimer were found to be surprisingly kinetically stable, as very little interconversion was seen over a course of months at 4 °C. The monomer was concentrated using Amicon<sup>®</sup> Ultra-4 centrifugal filter units (Millipore) and the final concentration of the protein was determined by absorbance at 280 nm using the extinction coefficient obtained by McNemar and coworkers (15,600 M<sup>-1</sup>).<sup>4</sup> The protein was frozen at 1 mg/mL concentration in 100  $\mu$ L aliquots which were thawed as required for experiments. The mass of the monomeric protein **3** (mass = 14177) was obtained using LC-MS.

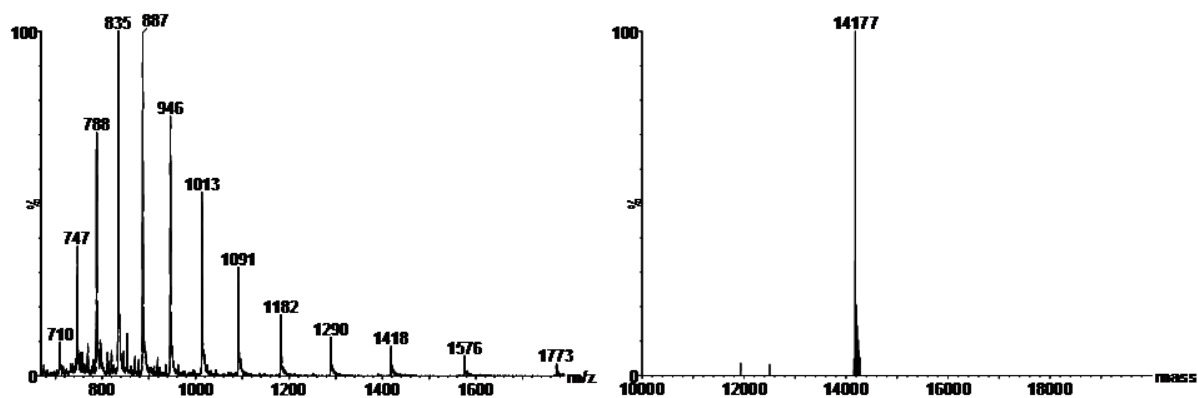

#### 4.2 Attempted Reaction of Grb2-SH2 Domain L111C with 1,2-Dihydro-pyridazine-3,6-dione 4

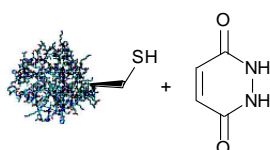

To a solution of model protein **3** (100  $\mu$ L, [Protein] 1.0 mg/mL, 100 mM sodium phosphate, 150 mM NaCl, pH 8.0) at 37  $^{\circ}$ C was added pyridazinedione **4** (5  $\mu$ L, 141 mM solution in DMF). The mixture was vortexed for 1 s then maintained at 37  $^{\circ}$ C for 16 h. Analysis using LC-MS showed that no reaction had occurred.

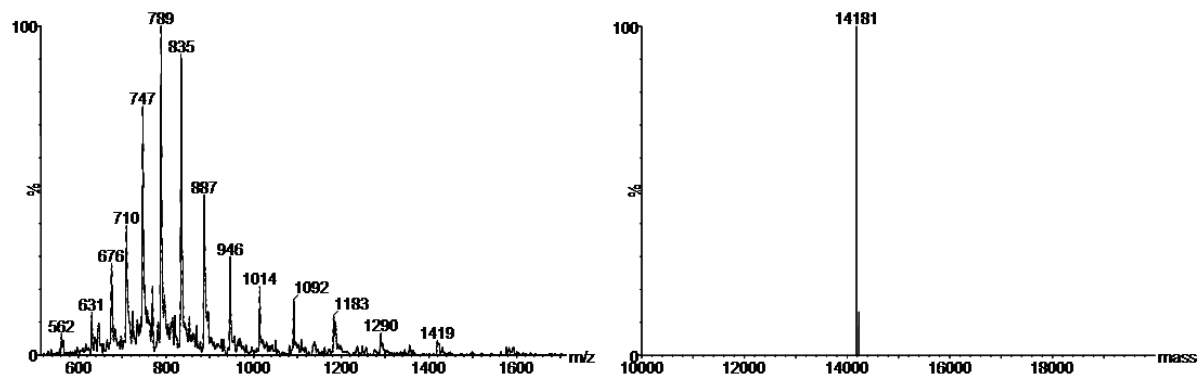

#### 4.3 Grb2-SH2 Domain L111C / 1,2-Diethyl-1,2-dihydro-pyridazine-3,6-dione Adduct 6

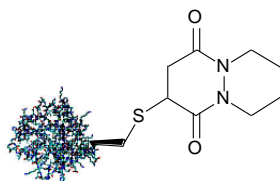

To a solution of model protein **3** (100  $\mu$ L, [Protein] 1.0 mg/mL, 100 mM sodium phosphate, 150 mM NaCl, pH 8.0) at 37  $^{\circ}$ C was added pyridazinedione **5** (5  $\mu$ L, 141 mM solution in DMF). The mixture was vortexed for 1 s then maintained at 37  $^{\circ}$ C for 16 h. Analysis using LC-MS showed that the desired product had been formed in quantitative conversion (mass = 14349).

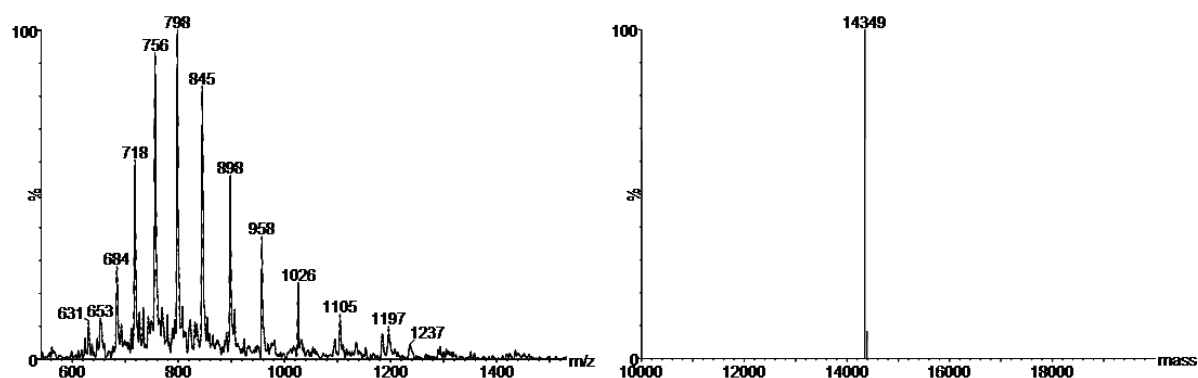

The mixture was treated with Ellman's reagent (5  $\mu$ L, 141 mM solution in H<sub>2</sub>O) at 0 °C. The mixture was vortexed for 1 s and maintained at 0 °C for 10 min after which the mixture was analysed by LC-MS. Analysis showed that no reaction with Ellman's reagent was evident thus highlighting that pyridazinedione functionalisation had occurred at C111.

#### 4.4 Grb2-SH2 Domain L111C / 4-Bromo-1,2-Diethyl-1,2-dihydro-pyridazine-3,6-dione Adduct 9

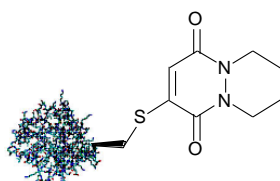

To a solution of model protein **3** (100  $\mu$ L, [Protein] 1.0 mg/mL, 100 mM sodium phosphate, 150 mM NaCl, pH 8.0) at 37 °C was added pyridazinedione **7** (5  $\mu$ L, 141 mM solution in DMF). The mixture was vortexed for 1 s then maintained at 37 °C for 1 h. Analysis using LC-MS showed that the desired product had been formed in quantitative conversion (mass = 14347).

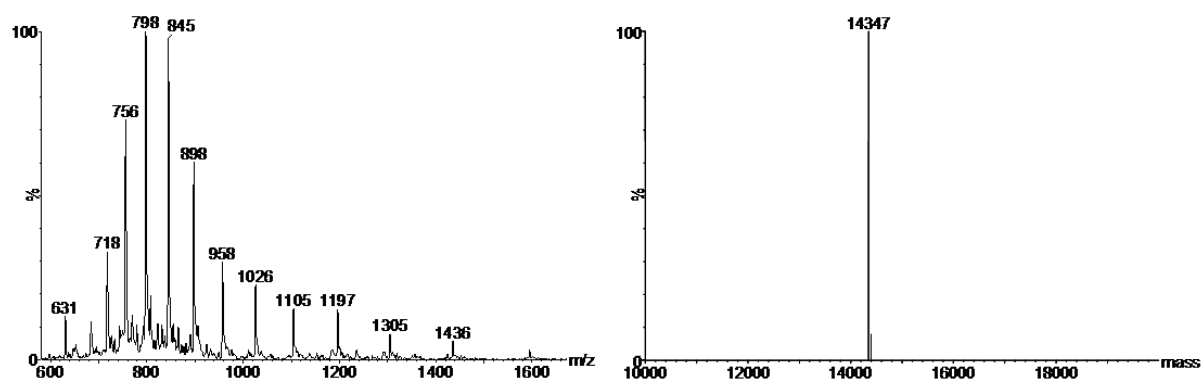

#### 4.5 2-Mercaptoethanol-mediated Cleavage of Grb2-SH2 Domain L111C / 4-Bromo-1,2-Diethyl-1,2-dihydro-pyridazine-3,6-dione Adduct **9** to yield Protein **3**

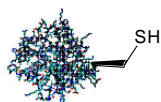

To a solution of model protein **3** (100  $\mu$ L, [Protein] 1.0 mg/mL, 100 mM sodium phosphate, 150 mM NaCl, pH 8.0) at 37  $^{\circ}$ C was added pyridazinedione **7** (5  $\mu$ L, 141 mM solution in DMF). The mixture was vortexed for 1 s then maintained at 37  $^{\circ}$ C for 1 h. Analysis using LC-MS showed that the protein / pyridazinedione conjugate **9** had been formed (mass = 14347).

The mixture was dialysed (100 mM sodium phosphate, 150 mM NaCl, pH 8.0, 1 L) (Slide-A-Lyzer<sup>®</sup>, 10,000 MWCO, Thermo Scientific) for 40 h at 4  $^{\circ}$ C. The mixture was then treated with 2-mercaptoethanol (5  $\mu$ L, 141 mM solution in H<sub>2</sub>O) at 20  $^{\circ}$ C. The mixture was vortexed for 1 s and maintained at 20  $^{\circ}$ C for 1 h after which the mixture was analysed by LC-MS. Analysis showed that the protein / pyridazinedione conjugate **9** had been cleaved yielding the Grb2-SH2 (L111C) **3** (mass = 14179) in quantitative conversion.

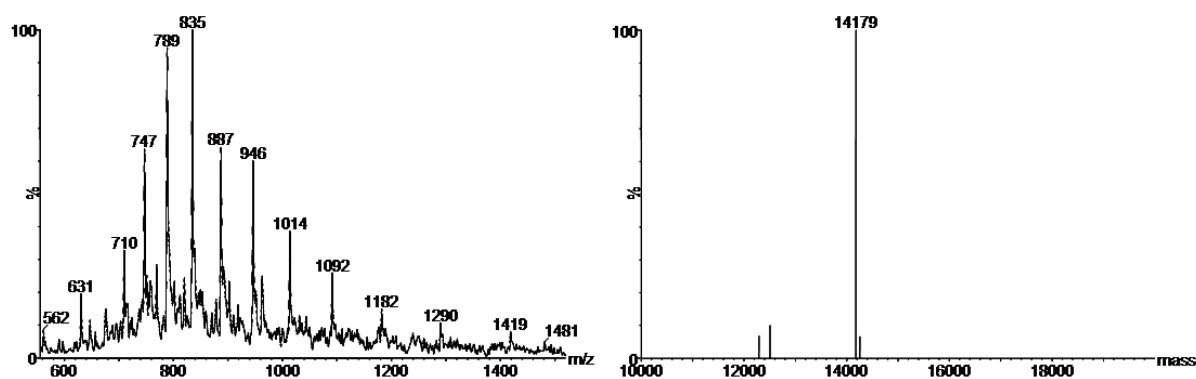

#### 4.6 Hydrolytic Stability of Grb2-SH2 Domain L111C / 4-Bromo-1,2-Diethyl-1,2-dihydro-pyridazine-3,6-dione Adduct **9** at 37 $^{\circ}$ C

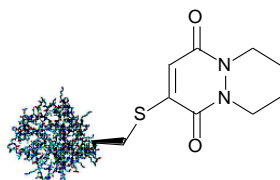

To a solution of model protein **3** (100  $\mu$ L, [Protein] 1.0 mg/mL, 100 mM sodium phosphate, 150 mM NaCl, pH 8.0) at 37  $^{\circ}$ C was added pyridazinedione **7** (5  $\mu$ L, 141 mM solution in DMF). The mixture was vortexed for 1 s then maintained at 37  $^{\circ}$ C for 1 h. Analysis using LC-MS showed that the protein / pyridazinedione conjugate **9** had been formed (mass = 14349).

The mixture was dialysed (100 mM sodium phosphate, 150 mM NaCl, pH 8.0, 1L) (Slide-A-Lyzer<sup>®</sup>, 10,000 MWCO, Thermo Scientific) for 40 h at 4  $^{\circ}$ C and then heated

at 37 °C for 5 h. Analysis using LC-MS showed that conjugate **9** was hydrolytically stable under these conditions.

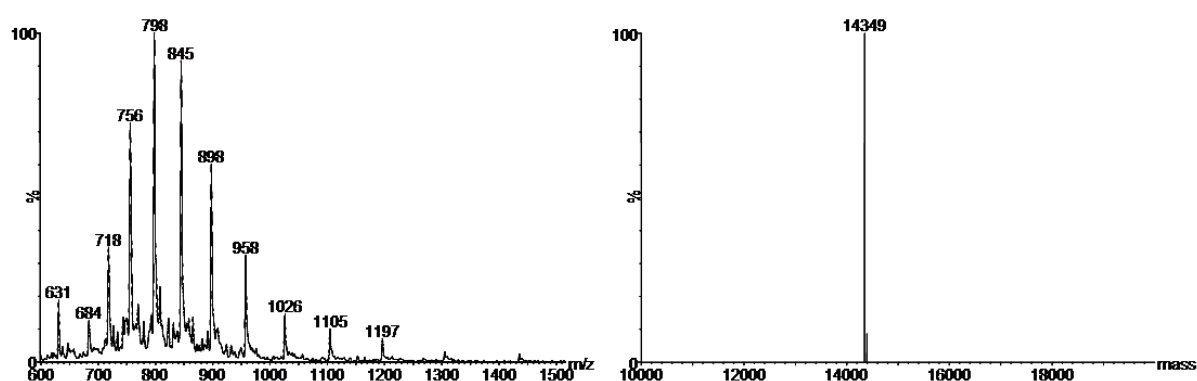

#### 4.7 Grb2-SH2 Domain L111C / 4,5-Dibromo-1,2-Diethyl-1,2-dihydro-pyridazine-3,6-dione Adduct **10**

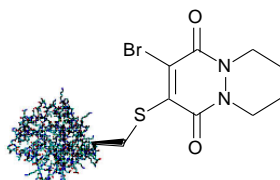

To a solution of model protein **3** (100  $\mu$ L, [Protein] 1.0 mg/mL, 100 mM sodium phosphate, 150 mM NaCl, pH 8.0) at 37 °C was added pyridazinedione **8** (5  $\mu$ L, 141 mM solution in DMF). The mixture was vortexed for 1 s then maintained at 37 °C for 1 h. Analysis using LC-MS showed that the desired product **10** had been formed (mass = 14428) in quantitative conversion.

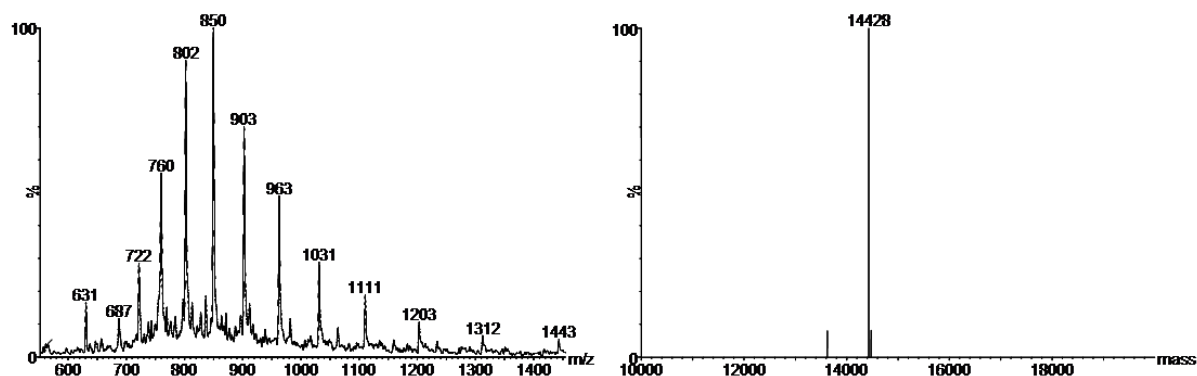

#### 4.8 Grb2-SH2 Domain L111C / 4,5-Dibromo-1,2-Diethyl-1,2-dihydro-pyridazine-3,6-dione / $\beta$ -1-thioglucose Adduct **11**

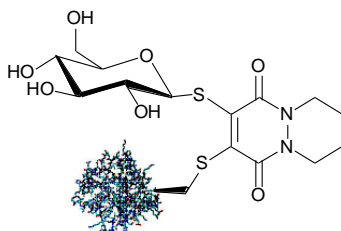

To a solution of model protein **3** (100  $\mu$ L, [Protein] 1.0 mg/mL, 100 mM sodium phosphate, 150 mM NaCl, pH 8.0) at 37  $^{\circ}$ C was added pyridazinedione **8** (5  $\mu$ L, 141 mM solution in DMF). The mixture was vortexed for 1 s then maintained at 37  $^{\circ}$ C for 1 h. Analysis using LC-MS showed that conjugate **10** had been formed (mass = 14428).

The mixture was dialysed (100 mM sodium phosphate, 150 mM NaCl, pH 8.0, 1 L) (Slide-A-Lyzer<sup>®</sup>, 10,000 MWCO, Thermo Scientific) for 40 h at 4  $^{\circ}$ C. The mixture was then treated with  $\beta$ -1-thioglucose, sodium salt (5  $\mu$ L, 14.1 mM solution in H<sub>2</sub>O) at 24  $^{\circ}$ C. The mixture was vortexed for 1 s and maintained at 24  $^{\circ}$ C for 1 h after which the mixture was analysed by LC-MS. Analysis showed that the desired product **11** (mass = 14539) was formed in quantitative conversion.

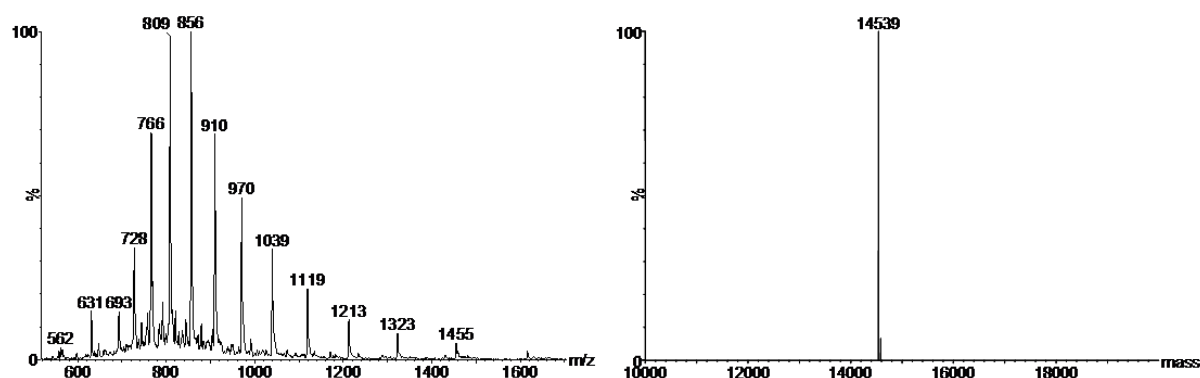

#### 4.9 2-Mercaptoethanol-mediated Cleavage of Grb2-SH2 Domain L111C / 4,5-Dibromo-1,2-Diethyl-1,2-dihydro-pyridazine-3,6-dione / $\beta$ -1-thioglucose Adduct **11** to yield Protein **3**

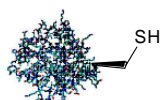

To a solution of model protein **3** (100  $\mu$ L, [Protein] 1.0 mg/mL, 100 mM sodium phosphate, 150 mM NaCl, pH 8.0) at 37  $^{\circ}$ C was added pyridazinedione **8** (5  $\mu$ L, 141 mM solution in DMF). The mixture was vortexed for 1 s then maintained at 37  $^{\circ}$ C for 1 h. Analysis using LC-MS showed that conjugate **10** had been formed (mass = 14428).



The mixture was dialysed (100 mM sodium phosphate, 150 mM NaCl, pH 8.0, 1 L) (Slide-A-Lyzer<sup>®</sup>, 10,000 MWCO, Thermo Scientific) for 40 h at 4 °C. The mixture was then treated with  $\beta$ -1-thioglucose, sodium salt (5  $\mu$ L, 14.1 mM solution in H<sub>2</sub>O) at 24 °C. The mixture was vortexed for 1 s and maintained at 24 °C for 1 h after which the mixture was analysed by LC-MS. Analysis showed that conjugate **11** (mass = 14538) was formed.

The mixture was then treated with 2-mercaptoethanol (5  $\mu$ L, 141 mM solution in H<sub>2</sub>O) at 24 °C. The mixture was vortexed for 1 s and maintained at 24 °C for 1 h after which the mixture was analysed by LC-MS. Analysis showed that conjugate **11** had been cleaved yielding Grb2-SH2 (L111C) **3** in quantitative conversion (mass = 14179).

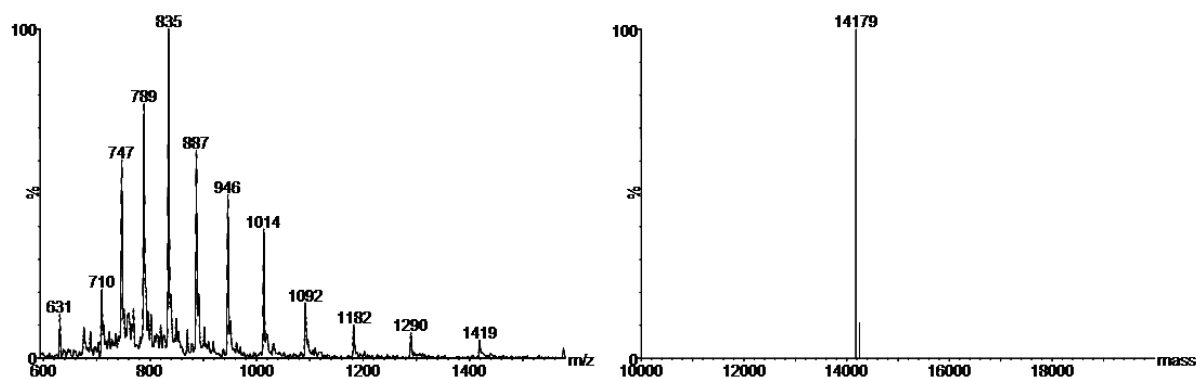

#### 4.10 Glutathione-mediated Cleavage of Grb2-SH2 Domain L111C / 4,5-Dibromo-1,2-Diethyl-1,2-dihydro-pyridazine-3,6-dione / $\beta$ -1-thioglucose Adduct **11** to yield Protein **3** at Physiological pH and Temperature

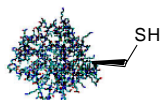

To a solution of model protein **3** (100  $\mu$ L, [Protein] 1.0 mg/mL, 100 mM sodium phosphate, 150 mM NaCl, pH 8.0) at 37 °C was added pyridazinedione **8** (5  $\mu$ L, 141 mM solution in DMF). The mixture was vortexed for 1 s then maintained at 37 °C for 1 h. Analysis using LC-MS showed that conjugate **10** had been formed (mass = 14428).

The mixture was dialysed (100 mM sodium phosphate, 150 mM NaCl, pH 7.2, 1 L) (Slide-A-Lyzer<sup>®</sup>, 10,000 MWCO, Thermo Scientific) for 40 h at 4 °C. The mixture was then treated with  $\beta$ -1-thioglucose, sodium salt (5  $\mu$ L, 14.1 mM solution in H<sub>2</sub>O) at 24 °C. The mixture was vortexed for 1 s and maintained at 24 °C for 1 h after which the mixture was analysed by LC-MS. Analysis showed that conjugate **11** (mass = 14538) was formed.

The mixture was then treated with glutathione (5  $\mu$ L, 20 mM solution in H<sub>2</sub>O) at 37 °C. The mixture was vortexed for 1 s and maintained at 37 °C for 4 h after which the mixture was analysed by LC-MS. Analysis showed that conjugate **11** had been cleaved yielding Grb2-SH2 (L111C) **3** (mass = 14177) in quantitative conversion.

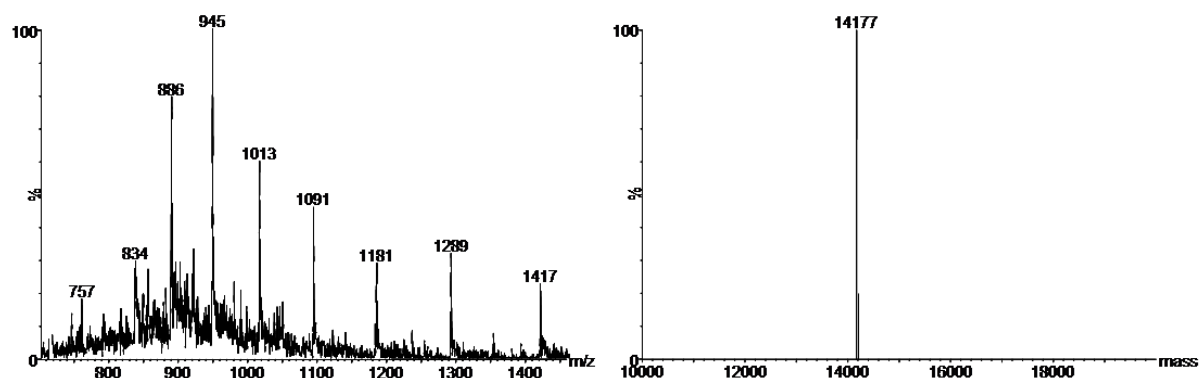

#### 4.11 Hydrolytic Stability of Grb2-SH2 Domain L111C / 4,5-Dibromo-1,2-Diethyl-1,2-dihydro-pyridazine-3,6-dione / $\beta$ -1-thioglucose Adduct **11** at 37 °C

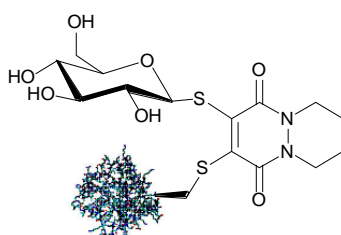

To a solution of model protein **3** (100  $\mu$ L, [Protein] 1.0 mg/mL, 100 mM sodium phosphate, 150 mM NaCl, pH 8.0) at 37 °C was added pyridazinedione **8** (5  $\mu$ L, 141 mM solution in DMF). The mixture was vortexed for 1 s then maintained at 37 °C for 1 h. Analysis using LC-MS showed that conjugate **10** had been formed (mass = 14428).

The mixture was dialysed (100 mM sodium phosphate, 150 mM NaCl, pH 8.0, 1 L) (Slide-A-Lyzer<sup>®</sup>, 10,000 MWCO, Thermo Scientific) for 40 h at 4 °C. The mixture was then treated with  $\beta$ -1-thioglucose, sodium salt (5  $\mu$ L, 14.1 mM solution in H<sub>2</sub>O) at 24 °C. The mixture was vortexed for 1 s and maintained at 24 °C for 1 h after which the mixture was analysed by LC-MS. Analysis showed that conjugate **11** (mass = 14543) was formed.

The mixture was then heated at 37 °C for 5 h. Analysis using LC-MS showed that conjugate **11** was hydrolytically stable under these conditions.

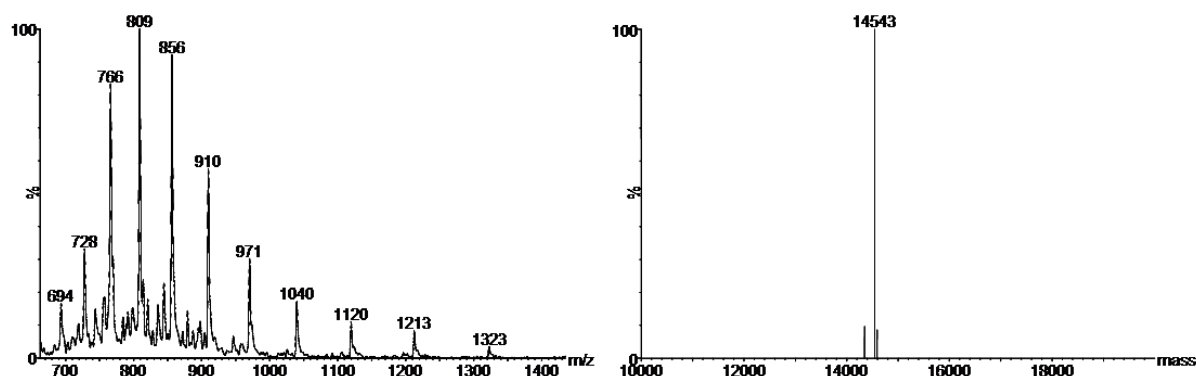

#### 4.12 4,5-Dibromo-1,2-Diethyl-1,2-dihydro-pyridazine-3,6-dione-bridged Somatostatin Adduct **13**

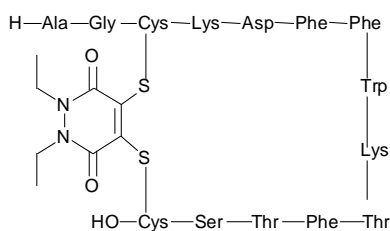

Lyophilised somatostatin (Sigma-Aldrich) **12** was solubilised in buffer (50 mM sodium phosphate, pH 6.2, 40% ACN, 2.5% DMF) to yield a concentration of 152.6  $\mu\text{M}$  (0.25 mg/mL) and reduced with TCEP (1.1 eq.) for 1 h at 20 °C. Completeness of the reduction was confirmed by LC-MS (mass = 1641).

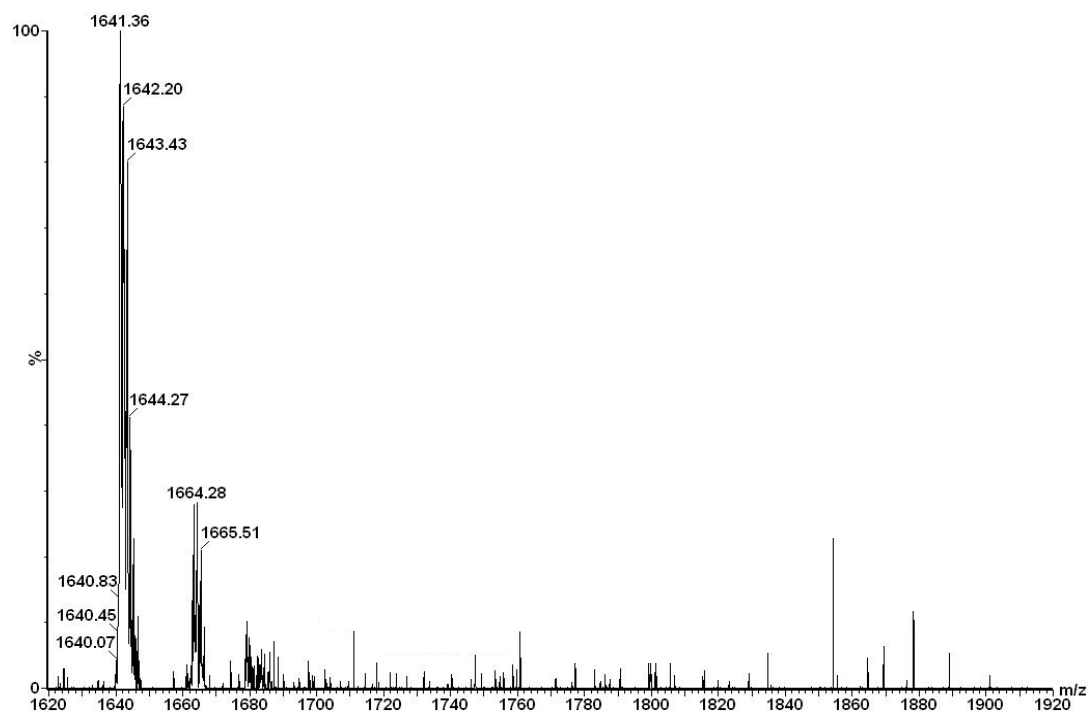

Pyridazinedione **8** (5 mol eq) was added and the mixture maintained at 20 °C for 2 h. Analysis using LC-MS showed that conjugate **13** (mass = 1806) was formed.

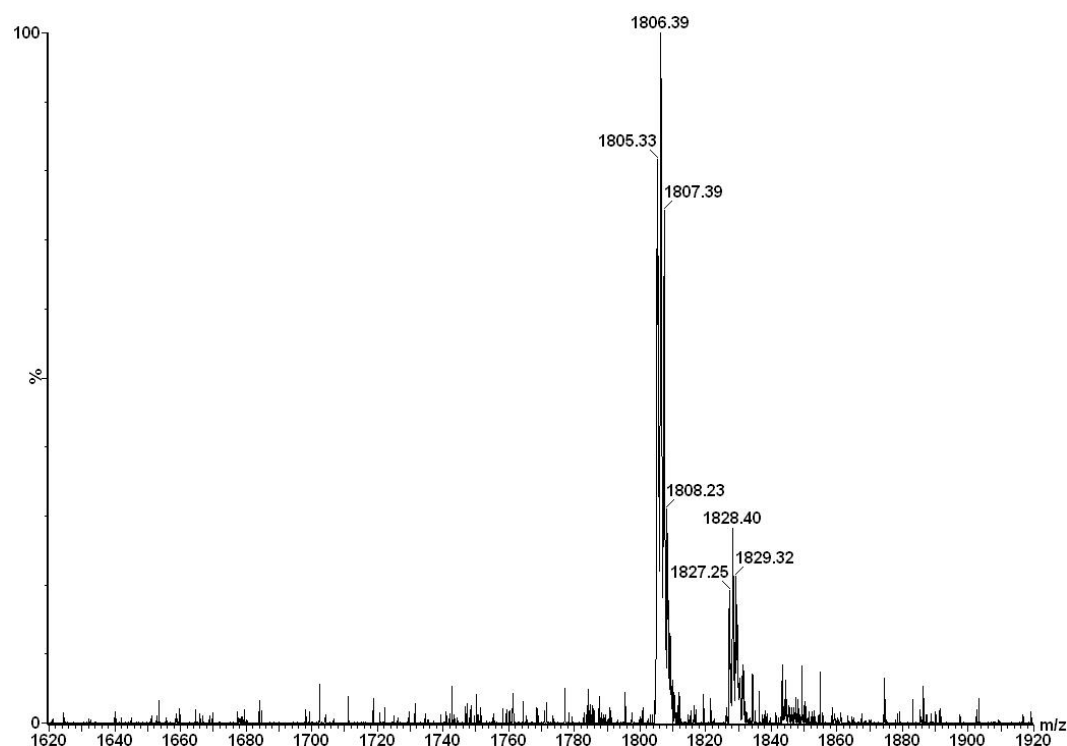

#### 4.13 2-Mercaptoethanol-mediated Cleavage of 4,5-Dibromo-1,2-Diethyl-1,2-dihydro-pyridazine-3,6-dione-bridged Somatostatin Adduct **13** to yield Reduced Somatostatin **14**

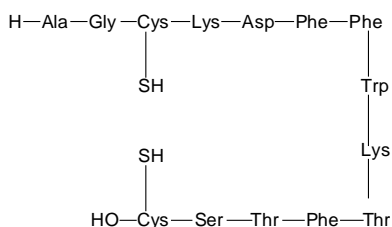

Lyophilised somatostatin (Sigma-Aldrich) **12** was solubilised in buffer (50 mM sodium phosphate, pH 6.2, 40% ACN, 2.5% DMF) to yield a concentration of 152.6  $\mu\text{M}$  (0.25 mg/mL) and reduced with TCEP (1.1 eq.) for 1 h at 20 °C. After completeness of the reduction had been confirmed by LC-MS (mass = 1641), pyridazinedione **8** (5 eq.) was added and the mixture maintained at 20 °C for 2 h. Analysis using LC-MS showed that conjugate **13** (mass = 1806) was formed.

The mixture was then treated with 2-mercaptoethanol (100 mol eq.) at 24 °C. The mixture was maintained at 24 °C for 72 h after which the mixture was analysed by LC-MS. Analysis showed that conjugate **13** had been cleaved yielding free reduced somatostatin **14** (mass = 1641) and a reduced somatostatin / 2-mercaptoethanol adduct (10-15 % total peptide) (mass = 1718).

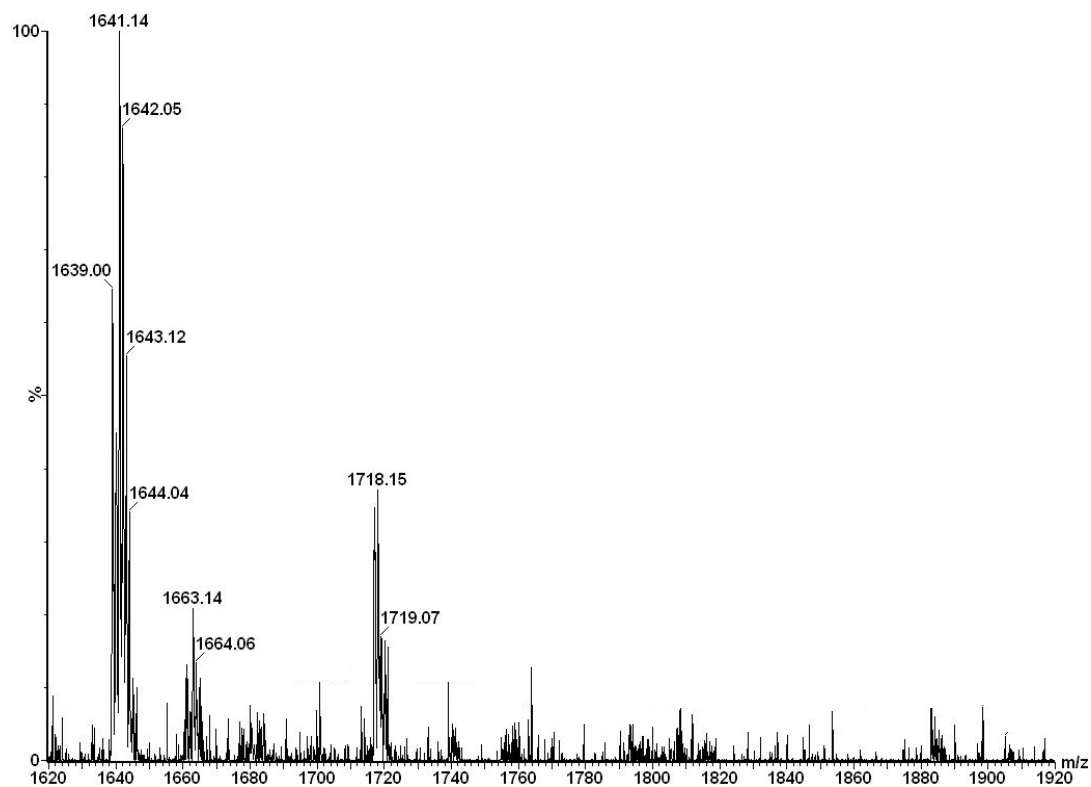

## References

1. Smith, M. E. B.; Schumacher, F. F.; Ryan, C. P.; Tedaldi, L. M.; Papaioannou, D.; Waksman, G.; Caddick, S.; Baker, J. R. *J. Am. Chem. Soc.*, **2010**, *132*, 1960-1965.
2. The plasmid encoding Grb2 SH2 domain (residues 53-163) was kindly provided by Dr. Stephen F Martin (University of Texas, A., TX).
3. Benfield, A. P.; Whiddon, B. B.; Clements, J. H.; Martin, S. F., *Arch. Biochem. Biophys.*, **2007**, *462*, 47-53.
4. McNemar, C.; Snow, M. E.; Windsor, W. T.; Prongay, A.; Mui, P.; Zhang, R. M.; Durkin, J.; Le, H. V.; Weber, P. C., *Biochemistry*, **1997**, *36*, 10006-10014.
